1  
2  
3  
4  
5  
6  
7  
8  
9  
10  
11  
12  
13  
14  
15  
16  
17  
18

**Contributions to human breast milk microbiome and enteromammary transfer of**  
*Bifidobacterium breve*

Kattayoun Kordy, MD<sup>1,2¶</sup>, Thaidra Gaufin, MD PhD<sup>3&</sup>, Martin Mwangi, MD<sup>3¶</sup>, Fan Li, PhD<sup>1,2,3¶</sup>,  
Chiara Cerini, MD<sup>1&</sup>, David J. Lee<sup>1¶</sup>, Helty Adisetiyo, PhD<sup>1&</sup>, Cora Woodward, PhD<sup>3&</sup>, Pia S.  
Pannaraj, MD MPH<sup>1,2&</sup>, Nicole H. Tobin, MD<sup>3¶</sup>, Grace M. Aldrovandi, MD CM<sup>3\*¶</sup>

<sup>1</sup>Children’s Hospital of Los Angeles, Los Angeles, CA; <sup>2</sup>Pediatrics, University of Southern  
California, Los Angeles, CA; <sup>3</sup>Department of Pediatrics, University of California Los Angeles,  
Los Angeles, CA

\*Correspondence and Reprints:

Email: [GAldrovandi@mednet.ucla.edu](mailto:GAldrovandi@mednet.ucla.edu)

¶These authors contributed equally to this work.

& These authors also contributed equally to this work.

19 **Abstract**

20

21 Increasing evidence supports the importance of the breast milk microbiome in seeding the infant  
22 gut. However, the origin of bacteria in milk and the process of milk microbe-mediated seeding of  
23 infant intestine need further elucidation. Presumed sources of bacteria in milk include locations  
24 of mother-infant and mother-environment interactions. We investigate the role of mother-infant  
25 interaction on breast milk microbes. Shotgun metagenomics and 16S rRNA gene sequencing  
26 identified milk microbes of mother-infant pairs in breastfed infants and in infants that have never  
27 latched. Although breast milk has low overall biomass, milk microbes play an important role in  
28 seeding the infant gut. Breast milk bacteria were largely comprised of *Staphylococcus*,  
29 *Streptococcus*, *Acinetobacter*, and *Enterobacter* primarily derived from maternal areolar skin and  
30 infant oral sites in breastfeeding pairs. This suggests that the process of breastfeeding is a  
31 potentially important mechanism for propagation of breast milk microbes through retrograde flux  
32 via infant oral and areolar skin contact. In one infant delivered via Caesarian section, a distinct  
33 strain of *Bifidobacteria breve* was identified in maternal rectum, breast milk and the infant's  
34 stool potentially suggesting direct transmission. This may support the existence of microbial  
35 translocation of this anaerobic bacteria via the enteromammary pathway in humans, where  
36 maternal bacteria translocate across the maternal gut and are transferred to the mammary glands.  
37 Modulating sources of human milk microbiome seeding potentially imply opportunities to  
38 ultimately influence the development of the infant microbiome and health.

39

## 40 **Introduction**

41 The complex interplay between the microbiome, maternal immune constituents and infant gut  
42 colonization is of great importance to the development of the human microbiome, however, the  
43 sources of microbes in human milk still require further elucidation. Both culture and non-culture  
44 methods have identified aerobic and anaerobic bacterial species in milk, including strict  
45 anaerobes typically compartmentalized in the gut (1-6). Precolostrum, prior to labor, contains  
46 bacterial species similar to milk after labor(6-8). The same microbes have been found in both  
47 milk and feces of mother-infant pairs(5). Human milk bacteria play an important role in  
48 establishing the infant gut microbiome, serving as a source of lactic acid-producing bacteria and  
49 human milk oligosaccharides for the infant gut(9, 10). Similar to murine models(11), human  
50 milk and its microbes facilitate differentiation of the neonatal intestinal epithelium, development  
51 of the gut associated lymphoid tissue and maturation of the neonatal immune system (12).

52

53 Proposed sources for the bacteria in human milk include skin and areolar bacteria, the  
54 environment, and infant's oral microbiota through retrograde flow that occurs during nursing(6,  
55 8, 13). Alterations in the bacterial composition of human milk have been associated with  
56 maternal BMI, weight gain, hormones, lactation stage, gestational age, and mode of delivery(13,  
57 14). Although controversial, the presence of an enteromammary pathway, whereby bacteria,  
58 assisted by dendritic cells, translocate across the maternal intestinal mucosa and are delivered to  
59 the lactating mammary gland, has been proposed as one source of the bacteria including  
60 anaerobes in pre-colostrum and milk(8, 15). There is some supportive evidence that maternal  
61 ingestion of probiotics increases breast milk levels of these microbes(16-18). If this pathway

62 proves to exist in humans, this suggests that modulation of maternal gut flora may directly  
63 impact infant health(15). While murine and bovine studies indicate that bacteria enter milk from  
64 an enteromammary pathway, this is challenging to prove in humans as it is complicated by  
65 potential seeding of the infant during vaginal delivery.

66

67 Disentangling the contributions of potential sources of bacteria in breast milk is difficult. We  
68 sought to assess breastfeeding and potential retrograde flow of bacteria from the infant's oral  
69 cavity by performing 16S rRNA gene sequencing on samples from two groups of mother-infant  
70 pairs, one in which infants latched onto their mother's breast and a second group of infants that  
71 never latched. Furthermore, we investigate the potential role of an enteromammary pathway to  
72 the human milk microbiome by performing shotgun metagenomic sequencing in an infant born  
73 via Caesarian section. We found that the process of breastfeeding is a potentially important  
74 mechanism for propagation of breast milk microbes through retrograde flux via infant oral and  
75 areolar skin contact. Our data also implicates a connection between *Bifidobacteria breve* in  
76 maternal gut and breast milk suggesting that intestinally-derived bacteria may translocate to the  
77 mammary gland and colonize the infant intestine.

78

79 **Materials and Methods**

80

81 A subset of mother-infant pairs were selected from a larger cohort who delivered in Los Angeles,  
82 California from 2010 to 2014. The Institutional Review Board of Children's Hospital of Los  
83 Angeles approved the study and written consent was obtained. Fifteen of the mother-infant pairs  
84 latched for breastfeeding and 5 infants who had never latched were selected for comparison.  
85 Samples collected included expressed milk, maternal areolar skin swabs, and infant stool  
86 samples as previously described(19). Swab samples were also obtained from the mother's oral  
87 mucosa, vagina, and rectum and the infant's buccal mucosa. After collection, swabs were either  
88 placed in Stool DNA Stabilizer buffer (Stratec, Berlin, Germany) or frozen 'neat' within 4 hours  
89 of collection and stored at -80°C.

90

91 DNA extraction and purification was performed on frozen human milk samples, areolar skin  
92 samples, stool samples, and swabs obtained from the oral mucosa, vagina, and rectum as  
93 previously described(19). Quantitative PCR (qPCR) was used to determine the copies of 16S and  
94 GAPDH genes per ng of total DNA extracted from each human milk sample. 16S targeting  
95 primers 515F (GTG YCA GCM GCC GCG GTA A) and 806R (GGA CTA CNV GGG TWT  
96 CTA AT) were designed based on Caporaso et al(20) and acquired from Eurofins Genomics  
97 (Louisville, KY). GAPDH primers GAPDH-for (ACC ACA GTC CAT GCC ATC AC) and  
98 GAPDH-rev (TCC ACC ACC CTG TTG CTG TA) were acquired from IDT (Skokie, Illinois) as  
99 ready-made primers. Quantitation for 16S and GAPDH targets were performed separately in  
100 qPCR reactions containing 1x SSO Advanced Universal SYBR Green Supermix (Bio-Rad,  
101 Hercules, CA), and 0.5 uM of each paired primer and approximately 1 ng of template  
102 DNA. qPCR thermocycling was carried out using a Bio-Rad CFX96 instrument with the

103 following conditions: GAPDH, 98C hold for 2 min followed by 40 cycles of 98C for 20 sec and  
104 60.5C for 40 sec; 16S, 98C hold for 2 min followed by 40 cycles of 98C for 20 sec and 61.C for  
105 40 sec. Standards for GAPDH were obtained by 10-fold serial dilutions of DNA extracted from  
106 human T cells and standards for 16S DNA were prepared as described previously(19). The  
107 samples and standards were analyzed in triplicate using the CFX Maestro program (Bio-Rad) and  
108 results are reported as the mean log copies/ng of total DNA.

109

110 For all 20 subjects, the V4 region of the 16S rRNA gene was amplified and sequenced as  
111 previously described(19, 21, 22). DNA amplicon concentrations were then quantified on a 2100  
112 Bioanalyzer (Agilent Technologies, Santa Clara, California, USA). Pooled libraries were  
113 sequenced on an Illumina MiSeq instrument using 2x150bp v2 chemistry (22). DADA2 version  
114 1.4 was used for error correction, sequence inference, and chimera filtering with default settings.  
115 Taxonomic classification was performed using the RDP naïve Bayesian classifier. Contaminant  
116 sequence variants were identified as those with at least 10% of their abundance derived from  
117 negative control samples and were excluded from all subsequent analyses as previously  
118 described(23). Diversity and ordination analyses were performed using the ‘phyloseq’ (version  
119 1.22.3) and vegan (version 2.5-2) R packages. Zero-inflated negative binomial (ZINB)  
120 regression models were used to test for differential abundance of specific bacterial taxa using  
121 rarefied sequence counts as the outcome and clinical covariates as the independent variable.  
122 Infant age in days was included as a covariate in all models to account for differences in  
123 microbial composition by age. The Benjamini-Hochberg FDR method was used to control for  
124 multiple hypotheses and results with an adjusted p-value less than 0.05 were accepted as

125 significant. Source tracking analysis to help determine site contribution to breast milk and infant  
126 stool was performed using SourceTracker version 1.0.0 with default parameters.

127

128 Shotgun metagenomic sequencing was performed as previously described(2) on 6 subjects in the  
129 latched cohort. Metagenomic libraries were constructed from the previously extracted DNA  
130 using the Illumina Nextera XT DNA library preparation kit following manufacturer's  
131 instructions. Sequencing was performed on a NextSeq500 platform to a target depth of 5 million  
132 reads per sample. Adapter trimming and quality filtering were performed using trim galore, host  
133 sequences were removed using kneadData, and taxonomic classification was performed with  
134 Kraken (v0.15-beta). ConStrains was used to perform strain-level analysis with parameters 'min-  
135 coverage 5'.

136

## 137 **Results**

138

139 Fifteen mother-infant pairs where the infant latched during breastfeeding and 5 mother-infant  
140 pairs whose mothers expressed breast milk but the infants did not latch for medical reasons were  
141 included (Table 1). Maternal age and length of pregnancy were similar between the two groups.  
142 However, more mother-infant pairs in the latched group were delivered vaginally (53%) whereas  
143 the majority (80%) of the non-latched group underwent a non-elective Cesarean section. More of

144 these never-latched infants (40%) and mothers (80%) received antibiotics than their latched  
145 counterparts.

146

147 **Table 1.** Clinical characteristics of mothers and their infants (n=20 mother-infant pairs).

| <b>Demographics of mother-infant pairs</b> |                       |                            |
|--------------------------------------------|-----------------------|----------------------------|
|                                            | <i>Latched (n=15)</i> | <i>Never-latched (n=5)</i> |
| Maternal age (years)                       | 29.5 (17-38)          | 25 (23-46)                 |
| Length of pregnancy (weeks)                | 39 (33-41)            | 38 (34-41)                 |
| Mode of delivery                           |                       |                            |
| Vaginal (%)                                | 8 (53.3%)             | 1 (20%)                    |
| Elective Cesarean (%)                      | 5 (33.3%)             | 0 (0%)                     |
| Non-elective Cesarean (%)                  | 2 (13.3%)             | 4 (80%)                    |
| Maternal antibiotic treatment              |                       |                            |
| Before delivery <sup>a</sup>               | 0 (0%)                | 0 (0%)                     |
| During delivery <sup>b</sup>               | 7 (46.7%)             | 4 (80%)                    |
| After delivery                             | 0 (0%)                | 0 (0%)                     |
| No antibiotic treatment                    | 8 (53.3%)             | 1 (20%)                    |
| Infant gender (male:female)                | 7:8                   | 4:1                        |



|                               |              |          |
|-------------------------------|--------------|----------|
| Infant age (days)             | 22.5 (3-111) | 5 (1-20) |
| Ethnicity                     |              |          |
| Hispanic                      | 10 (66.7%)   | 3 (60%)  |
| Caucasian                     | 2 (13.3%)    | 1 (20%)  |
| Asian                         | 3 (20%)      | 0 (0%)   |
| African American              | 0 (0%)       | 1 (20%)  |
| Feeding                       |              |          |
| Exclusive breast milk         | 6 (40%)      | 0 (0%)   |
| Mixed (formula + breast milk) | 9 (60%)      | 3 (60%)  |
| Nothing by mouth              | 0 (0%)       | 2 (20%)  |
| Infant antibiotic treatment   | 1 (6.7%)     | 2 (40%)  |

Data are shown as median, range, or percentage.

<sup>a</sup>During pregnancy until 48 hours before delivery.

<sup>b</sup>During the 48 hours before delivery and in labor.

148

149

150 Of the 20 mother-infant pairs, 15 pairs (13 latched and 2 never-latched) were included in the  
151 final analysis. Five pairs were eliminated due to insufficient quantity of qPCR-recovered milk  
152 bacteria or DNA and were not true positives by qPCR (1.69-5.22 log 16S V4 copies/ng DNA).  
153 Of the included never-latched pairs, 1 subject had 4 different milk samples longitudinally  
154 collected within the first two weeks of life included in the analysis. In the breastfed group, breast  
155 milk bacteria were largely comprised of *Staphylococcus*, *Streptococcus*, *Acinetobacter*, and  
156 *Enterobacter* which were primarily derived from areolar skin and infant oral sites according to  
157 SourceTracker analysis. Notably, the two mothers with never-latched infants showed different  
158 compositions with pure *Staphylococcus* in one and *Staphylococcus*, *Finegoldia* and  
159 *Corynebacterium* in the other (Figure 1A).

160

161 **Figure 1.** Microbiome composition of human milk samples. **(A)** Infant age (days) at time of  
162 sampling, relative abundance, maternal antibiotics in the 14 days prior to sampling, mode of  
163 delivery, and Shannon diversity of human milk samples from mothers with infants who either  
164 have latched or never latched. Samples from the same mother collected on different days are  
165 grouped. Milk from mothers who never had their infants latched were dominated by  
166 *Staphylococcus* in one and *Staphylococcus*, *Finegoldia* and *Corynebacterium* in the other. Note  
167 the absence of *Streptococcus* and lower overall diversity of never-latched samples. In contrast,  
168 samples from mothers with latched infants, also born via Caesarian section in the first 10 days of  
169 life (n=5), contained *Streptococcus*, *Acinetobacter*, and *Enterobacter* in addition to  
170 *Staphylococcus*.

171

172 In a sub-analysis of the latched samples, exclusive breastfeeding was a significant driver of  
173 overall microbial variation ( $R^2=0.028$ ,  $p<0.001$ ). No significant differences in diversity or  
174 relative abundance of specific bacterial taxa were noted by exclusive breastfeeding, delivery, or  
175 sex. Intriguingly, *Bifidobacterium* on 16S rRNA sequencing was found in the breast milk, infant  
176 stool, and maternal rectal samples from a single mother-infant pair with Caesarian delivery. We  
177 utilized shotgun metagenomics to further resolve the strain identity of this shared  
178 *Bifidobacterium*. Species-level analysis showed *Bifidobacterium breve* to be only a minor  
179 component of the maternal gut community (0.07% relative abundance) but a significantly larger  
180 portion of the breast milk and infant gut microbiomes (28.44% and 67.7% relative abundance,  
181 respectively) (Figure 1B). Strain-level mutational profiles also revealed a distinct strain of  
182 *Bifidobacterium breve* to be common across these three samples from the same mother-infant  
183 pair.

184

185 **Figure 1.** Microbiome composition of human milk samples. **(B)** Relative abundance  
186 of *Bifidobacterium* by targeted 16S rRNA gene sequencing (left) and shotgun metagenomics  
187 (right) in a single milk sample (arrow) shown in Panel A. *Bifidobacterium breve* appears to be  
188 selectively secreted in the mother's milk and then makes up the majority of her infant's early gut  
189 microbiome.

190

191 **Discussion**

192

193 The process of breast feeding plays a critical role in development of the infant gut microbiome.  
194 The initial seeding of the infant gut in the first few months of life is necessary for infant immune  
195 development and overall health(24-28) with breastfeeding exclusivity and percentage critically  
196 influencing the infant gut microbiome(19, 28). In our analysis, the breast milk and infant  
197 microbiomes are seeded through multiple pathways, though primarily from areolar skin and  
198 infant oral sites. Additionally, a single mother-infant breastfeeding pair provide intriguing  
199 evidence for an enteromammary pathway contributing the same strain of *Bifidobacterium breve*  
200 found in maternal intestinal and milk compartments as well as her infant's gut. This infant was  
201 delivered via Caesarian section limiting the possibility of infant colonization during delivery.  
202 Furthermore, even though *Bifidobacterium breve* constituted less than 1% of the maternal rectal  
203 sample, it made up 28% of the maternal milk sample suggesting that this species was selected for  
204 in breast milk. This single species of bacteria then composed 68% of the infant's gut  
205 microbiome.

206

207 There is increasing evidence of transfer of anaerobic *Bifidobacteria* from maternal intestine to  
208 breast milk then colonizing and expanding in infant gut(5). *Bifidobacteria* are amongst the first  
209 bacteria to colonize the infant intestine and are associated with decreases in the risk of obesity,  
210 asthma, atopy, and all-cause mortality from necrotizing enterocolitis in pre-term infants(24, 29,  
211 30). Given the importance of *Bifidobacteria* in infant health, it is logical for mothers to  
212 selectively secrete and support colonization by this bacterial population.

213

214 Milk ducts are bidirectional channels (31) so it is likely that bacteria from skin and the infant oral  
215 cavity populate human milk. Furthermore, there is recent support that strains of bacteria found in  
216 precolostrum may have a significant impact in the initial establishment of the infant oral  
217 microbiota (6). Our analysis is also suggestive of the role of retrograde oral seeding of bacteria  
218 into maternal milk from the act of infant suckling. Both mother-infant pairs with sufficient data  
219 where the infant never latched had a predominance of skin flora consisting mostly of  
220 *Staphylococcus* and some *Corynebacterium* with a notable absence of *Streptococcus*. In contrast,  
221 most of the milk samples from latching pairs had at least some and often a majority of  
222 *Streptococcus* present in their milk samples. Latched samples also had a greater overall diversity  
223 including *Acinetobacter*, *Enterobacter*, *Veillonella*, and *Haemophilus* in addition to the  
224 *Staphylococcus*, *Streptococcus* and *Corynebacterium*, consistent with previous studies(13).  
225 However, with only 2 of the never-latched mothers having sufficient bacteria present in their  
226 milk for analysis, our data are insufficient to draw any definitive conclusions about the role of  
227 latching on milk microbe composition.

228

229 Our study is limited by the small sample size and by the inability to show directionality of  
230 bacterial transfer. Some microbes found on areolar skin are also present on the mucosal surfaces  
231 of the gastrointestinal tract(8) and our methods do not determine the source of these microbes in  
232 the breast milk. Prior investigations have demonstrated an enteromammary pathway in animals  
233 (8, 15) and a viable strain of *Bifidobacterium breve* in maternal faeces, breast milk and neonatal

234 faeces in vaginally delivered infants (5). Although our report suggest evidence for an  
235 enteromammary pathway by finding a single strain of *Bifidobacterium breve* in maternal rectum,  
236 breastmilk and infant stool, there is a possibility that maternal fecal microbes can be spread by  
237 the mother herself to the skin and breast although this is less likely in an infant delivered via  
238 Caesarian section. More definitive evidence is required to support the role of an enteromammary  
239 pathway in humans for translocating critical microbial communities to the breast milk  
240 compartment and eventually seeding the infant gut via breastfeeding. Our findings need to be  
241 investigated with larger cohorts and molecular-based surveys or culture-based analyses to  
242 validate the shotgun metagenomics data.

243

244 In conclusion, our data suggests that the process of breastfeeding and interaction between areolar  
245 skin and infant oral cavity are potentially critical for seeding the milk microbiome. Furthermore,  
246 our report provides intriguing evidence suggestive of an enteromammary pathway in humans  
247 with transfer of a single strain of *Bifidobacterium breve* in maternal intestine, breastmilk and  
248 infant stool in an infant delivered via Caesarian section. These sources of milk microbiome  
249 seeding, if verified in larger studies, may support opportunities to modulate bacteria found in  
250 human breast milk and ultimately development of the infant microbiome.

251

252 **Acknowledgments**

253 The authors are grateful to the volunteers, their families, and their medical providers for  
254 participating in this study. Special thanks to Amit Oberai for his assistance with the initial  
255 analysis of this data.

256

257 **Accession Numbers**

258 Sequencing data are available from the NCBI Short Read Archive (SRA) under  
259 submission SUB4724831 and BioProject PRJNA295847.

## 261 **References**

- 262 1. Jimenez E, Delgado S, Fernandez L, Garcia N, Albuja M, Gomez A, et al. Assessment of the  
263 bacterial diversity of human colostrum and screening of staphylococcal and enterococcal populations for  
264 potential virulence factors. *Res Microbiol.* 2008;159(9-10):595-601.
- 265 2. Asnicar F, Manara S, Zolfo M, Truong DT, Scholz M, Armanini F, et al. Studying Vertical  
266 Microbiome Transmission from Mothers to Infants by Strain-Level Metagenomic Profiling. *mSystems.*  
267 2017;2(1).
- 268 3. Collado MC, Delgado S, Maldonado A, Rodriguez JM. Assessment of the bacterial diversity of  
269 breast milk of healthy women by quantitative real-time PCR. *Lett Appl Microbiol.* 2009;48(5):523-8.
- 270 4. Hunt KM, Foster JA, Forney LJ, Schutte UM, Beck DL, Abdo Z, et al. Characterization of the  
271 diversity and temporal stability of bacterial communities in human milk. *PLoS One.* 2011;6(6):e21313.
- 272 5. Jost T, Lacroix C, Braegger CP, Rochat F, Chassard C. Vertical mother-neonate transfer of  
273 maternal gut bacteria via breastfeeding. *Environ Microbiol.* 2014;16(9):2891-904.
- 274 6. Ruiz L, Bacigalupe R, García-Carral C, Boix-Amoros A, Argüello H, Silva CB, et al. Microbiota of  
275 human precolostrum and its potential role as a source of bacteria to the infant mouth. *Scientific reports.*  
276 2019;9(1):8435.
- 277 7. Donnet-Hughes A, Perez PF, Dore J, Leclerc M, Levenez F, Benyacoub J, et al. Potential role of  
278 the intestinal microbiota of the mother in neonatal immune education. *Proc Nutr Soc.* 2010;69(3):407-  
279 15.
- 280 8. Rodriguez JM. The origin of human milk bacteria: is there a bacterial entero-mammary pathway  
281 during late pregnancy and lactation? *Adv Nutr.* 2014;5(6):779-84.
- 282 9. Martin R, Langa S, Reviriego C, Jimenez E, Marin ML, Xaus J, et al. Human milk is a source of lactic  
283 acid bacteria for the infant gut. *J Pediatr.* 2003;143(6):754-8.
- 284 10. Marcobal A, Sonnenburg JL. Human milk oligosaccharide consumption by intestinal microbiota.  
285 *Clinical microbiology and infection : the official publication of the European Society of Clinical*  
286 *Microbiology and Infectious Diseases.* 2012;18 Suppl 4:12-5.
- 287 11. Gaboriau-Routhiau V, Rakotobe S, Lecuyer E, Mulder I, Lan A, Bridonneau C, et al. The key role  
288 of segmented filamentous bacteria in the coordinated maturation of gut helper T cell responses.  
289 *Immunity.* 2009;31(4):677-89.
- 290 12. Perez PF, Dore J, Leclerc M, Levenez F, Benyacoub J, Serrant P, et al. Bacterial imprinting of the  
291 neonatal immune system: lessons from maternal cells? *Pediatrics.* 2007;119(3):e724-32.
- 292 13. Cabrera-Rubio R, Collado MC, Laitinen K, Salminen S, Isolauri E, Mira A. The human milk  
293 microbiome changes over lactation and is shaped by maternal weight and mode of delivery. *Am J Clin*  
294 *Nutr.* 2012;96(3):544-51.
- 295 14. Khodayar-Pardo P, Mira-Pascual L, Collado MC, Martinez-Costa C. Impact of lactation stage,  
296 gestational age and mode of delivery on breast milk microbiota. *J Perinatol.* 2014;34(8):599-605.
- 297 15. Martin R, Langa S, Reviriego C, Jimenez E, Marin ML, Olivares M, et al. The commensal  
298 microflora of human milk: new perspectives for food bacteriotherapy and probiotics. *Trends in Food*  
299 *Science & Technology.* 2004;15:121-7.
- 300 16. Abrahamsson TR, Sinkiewicz G, Jakobsson T, Fredrikson M, Bjorksten B. Probiotic lactobacilli in  
301 breast milk and infant stool in relation to oral intake during the first year of life. *Journal of pediatric*  
302 *gastroenterology and nutrition.* 2009;49(3):349-54.



- 303 17. Arroyo R, Martin V, Maldonado A, Jimenez E, Fernandez L, Rodriguez JM. Treatment of  
304 infectious mastitis during lactation: antibiotics versus oral administration of Lactobacilli isolated from  
305 breast milk. *Clin Infect Dis*. 2010;50(12):1551-8.
- 306 18. Simpson MR, Avershina E, Storro O, Johnsen R, Rudi K, Oien T. Breastfeeding-associated  
307 microbiota in human milk following supplementation with *Lactobacillus rhamnosus* GG, *Lactobacillus*  
308 *acidophilus* La-5, and *Bifidobacterium animalis* ssp. *lactis* Bb-12. *J Dairy Sci*. 2018;101(2):889-99.
- 309 19. Pannaraj PS, Li F, Cerini C, Bender JM, Yang S, Rollie A, et al. Association Between Breast Milk  
310 Bacterial Communities and Establishment and Development of the Infant Gut Microbiome. *JAMA*  
311 *Pediatr*. 2017;171(7):647-54.
- 312 20. Caporaso JG, Lauber CL, Walters WA, Berg-Lyons D, Lozupone CA, Turnbaugh PJ, et al. Global  
313 patterns of 16S rRNA diversity at a depth of millions of sequences per sample. *Proc Natl Acad Sci U S A*.  
314 2011;108 Suppl 1:4516-22.
- 315 21. Tobin NH, Woodward C, Zabih S, Lee DJ, Li F, Aldrovandi GM. A Method for Targeted 16S  
316 Sequencing of Human Milk Samples. *J Vis Exp*. 2018(133).
- 317 22. Caporaso JG, Lauber CL, Walters WA, Berg-Lyons D, Huntley J, Fierer N, et al. Ultra-high-  
318 throughput microbial community analysis on the Illumina HiSeq and MiSeq platforms. *ISME J*.  
319 2012;6(8):1621-4.
- 320 23. Bender JM, Li F, Adisetiyo H, Lee D, Zabih S, Hung L, et al. Quantification of variation and the  
321 impact of biomass in targeted 16S rRNA gene sequencing studies. *Microbiome*. 2018;6(1):155.
- 322 24. Fujimura KE, Lynch SV. Microbiota in allergy and asthma and the emerging relationship with the  
323 gut microbiome. *Cell Host Microbe*. 2015;17(5):592-602.
- 324 25. Toscano M, De Grandi R, Grossi E, Drago L. Role of the Human Breast Milk-Associated  
325 Microbiota on the Newborns' Immune System: A Mini Review. *Front Microbiol*. 2017;8:2100.
- 326 26. Azad MB, Konya T, Maughan H, Guttman DS, Field CJ, Chari RS, et al. Gut microbiota of healthy  
327 Canadian infants: profiles by mode of delivery and infant diet at 4 months. *CMAJ*. 2013;185(5):385-94.
- 328 27. Gaufin T, Tobin NH, Aldrovandi GM. The importance of the microbiome in pediatrics and  
329 pediatric infectious diseases. *Curr Opin Pediatr*. 2018;30(1):117-24.
- 330 28. Ho NT, Li F, Lee-Sarwar KA, Tun HM, Brown BP, Pannaraj PS, et al. Meta-analysis of effects of  
331 exclusive breastfeeding on infant gut microbiota across populations. *Nature communications*.  
332 2018;9(1):4169.
- 333 29. Kalliomaki M, Collado MC, Salminen S, Isolauri E. Early differences in fecal microbiota  
334 composition in children may predict overweight. *Am J Clin Nutr*. 2008;87(3):534-8.
- 335 30. Patole SK, Rao SC, Keil AD, Nathan EA, Doherty DA, Simmer KN. Benefits of *Bifidobacterium*  
336 *breve* M-16V Supplementation in Preterm Neonates - A Retrospective Cohort Study. *PLoS One*.  
337 2016;11(3):e0150775.
- 338 31. Ramsay DT, Kent JC, Owens RA, Hartmann PE. Ultrasound imaging of milk ejection in the breast  
339 of lactating women. *Pediatrics*. 2004;113(2):361-7.

340

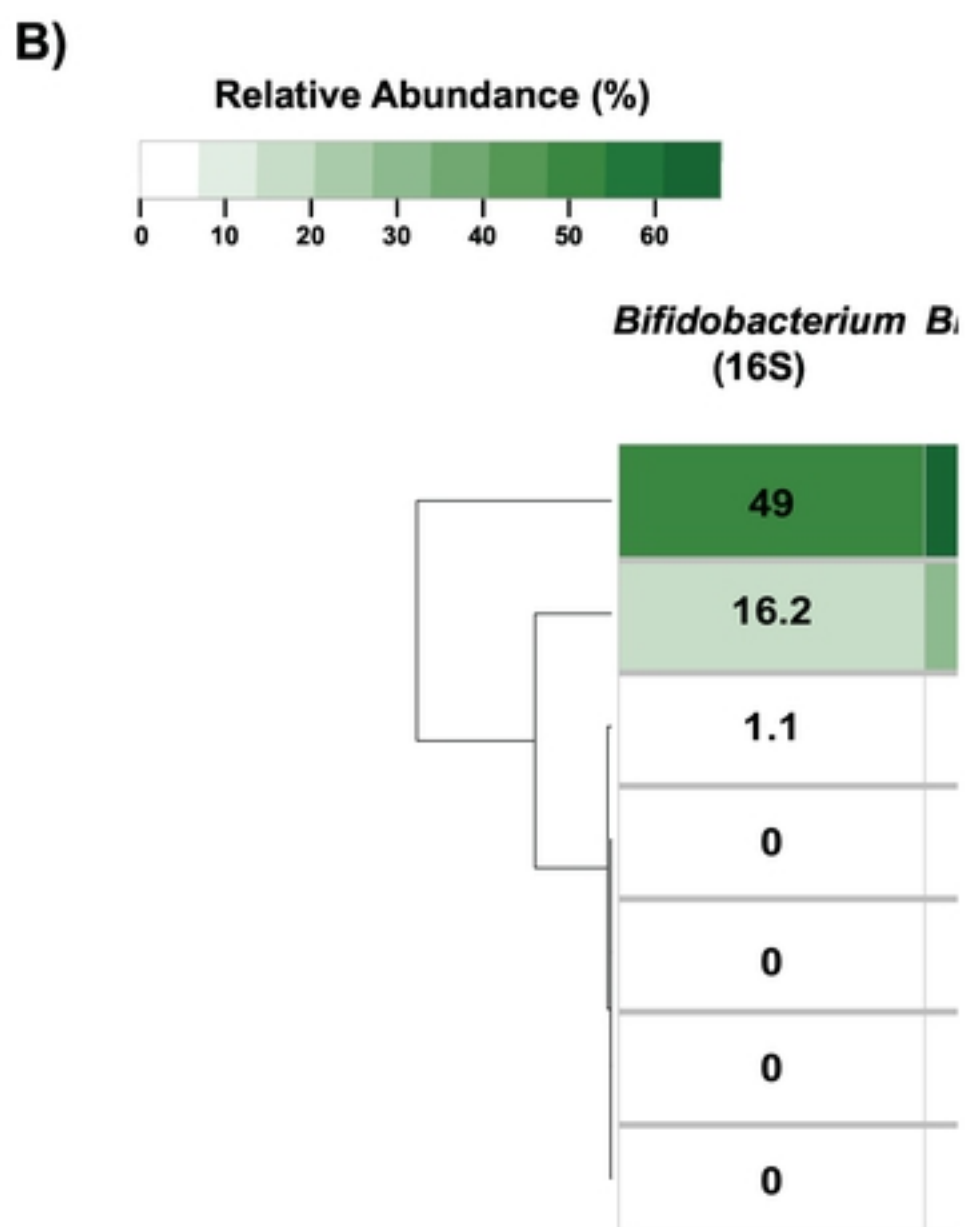

Source: http://biorxiv.org/content/10.1101/688754v1.full.pdf
